# Supplementary material for: Associations of Atrial Fibrillation with Mild Cognitive Impairment and Dementia: An Investigation Using SPRINT Research Materials
Source: MDPI journal article supplement (doi:10.3390/jcm11195800), 2022-09-30
Supplement: s1 [file s1]

**Supplemental Table S1.** Hazard ratios and 95% confidence intervals for association of 4 levels of (time-dependent) AF status with dementia or MCI, stratified by education.

|                                | No AF    | Self-report only AF | Safety event AF only or<br>self-report + safety events | ECG AF            |
|--------------------------------|----------|---------------------|--------------------------------------------------------|-------------------|
| <b>No College (N = 2,718)</b>  |          |                     |                                                        |                   |
| <b>N. cases</b>                | 350      | 15                  | 16                                                     | 24                |
| <b>P-years</b>                 | 10,602   | 523                 | 316                                                    | 355               |
| <b>Incidence rate*</b>         | 33.0     | 28.7                | 50.6                                                   | 67.6              |
| <b>Model 1</b>                 | 1 (Ref.) | 0.72 (0.46, 1.12)   | 1.00 (0.54, 1.86)                                      | 2.17 (1.24, 3.81) |
| <b>Model 2</b>                 | 1 (Ref.) | 0.71 (0.44, 1.14)   | 0.97 (0.52, 1.80)                                      | 2.12 (1.19, 3.78) |
| <b>College (N = 5,751)</b>     |          |                     |                                                        |                   |
| <b>N. cases</b>                | 388      | 25                  | 12                                                     | 28                |
| <b>P-years</b>                 | 24,114   | 1,512               | 638                                                    | 948               |
| <b>Incidence rate*</b>         | 16.1     | 16.5                | 18.8                                                   | 29.5              |
| <b>Model 1</b>                 | 1 (Ref.) | 0.73 (0.51, 1.04)   | 0.99 (0.55, 1.80)                                      | 1.18 (0.68, 2.04) |
| <b>Model 2</b>                 | 1 (Ref.) | 0.76 (0.52, 1.11)   | 0.99 (0.54, 1.79)                                      | 1.19 (0.68, 2.10) |
| <b>P-value for interaction</b> |          | 0.24                | 0.76                                                   | 0.84              |

\*Crude incidence rate, per 1000 p-years. Model 1: adjusted for age at randomization, sex, and race/ethnicity Model 2: adjusted for age at randomization, sex, race/ethnicity, OAC use, smoking, history of CVD, total cholesterol, HDL cholesterol, eGFR, systolic and diastolic pressure, and BMI.

**Supplemental Table S2.** Hazard ratios and 95% confidence intervals for association of 4 levels of (time-dependent) AF status with dementia or MCI, stratified by sex.

|                                | No AF    | Self-report only AF | Safety event AF only or<br>self-report + safety events | ECG AF            |
|--------------------------------|----------|---------------------|--------------------------------------------------------|-------------------|
| <b>Male (N = 5,503)</b>        |          |                     |                                                        |                   |
| <b>N. cases</b>                | 468      | 26                  | 19                                                     | 39                |
| <b>P-years</b>                 | 22,268   | 1,420               | 617                                                    | 989               |
| <b>Incidence rate*</b>         | 21.0     | 18.3                | 30.8                                                   | 39.4              |
| <b>Model 1</b>                 | 1 (Ref.) | 0.65 (0.46, 0.92)   | 0.87 (0.50, 1.50)                                      | 1.78 (1.12, 2.83) |
| <b>Model 2</b>                 | 1 (Ref.) | 0.67 (0.46, 0.98)   | 0.86 (0.50, 1.49)                                      | 1.77 (1.09, 2.88) |
| <b>Female (N = 2,966)</b>      |          |                     |                                                        |                   |
| <b>N. cases</b>                | 270      | 14                  | 9                                                      | 13                |
| <b>P-years</b>                 | 12,448   | 615                 | 337                                                    | 314               |
| <b>Incidence rate*</b>         | 21.7     | 22.8                | 26.7                                                   | 41.4              |
| <b>Model 1</b>                 | 1 (Ref.) | 0.98 (0.31, 1.58)   | 1.34 (0.67, 2.66)                                      | 1.23 (0.58, 2.61) |
| <b>Model 2</b>                 | 1 (Ref.) | 0.95 (0.58, 1.58)   | 1.24 (0.62, 2.46)                                      | 1.21 (0.56, 2.58) |
| <b>P-value for interaction</b> |          | 0.43                | 0.46                                                   | 0.38              |

\*Crude incidence rate, per 1000 p-years. Model 1: adjusted for age at randomization, education, and race/ethnicity Model 2: adjusted for age at randomization, education, race/ethnicity, OAC use, smoking, history of CVD, total cholesterol, HDL cholesterol, eGFR, systolic and diastolic pressure, and BMI.

**Supplemental Table S3.** Hazard ratios and 95% confidence intervals for association of 4 levels of (time-dependent) AF status with dementia or MCI, stratified by race\*.

|                                | No AF    | Self-report only AF | Safety event AF only or<br>self-report + safety events | ECG AF            |
|--------------------------------|----------|---------------------|--------------------------------------------------------|-------------------|
| <b>White (N = 4,949)</b>       |          |                     |                                                        |                   |
| <b>N. cases</b>                | 356      | 25                  | 20                                                     | 35                |
| <b>P-years</b>                 | 19,985   | 1,504               | 773                                                    | 1,078             |
| <b>Incidence rate**</b>        | 17.8     | 16.6                | 25.9                                                   | 32.5              |
| <b>Model 1</b>                 | 1 (Ref.) | 0.61 (0.43, 0.87)   | 0.95 (0.57, 1.60)                                      | 1.39 (0.86, 2.26) |
| <b>Model 2</b>                 | 1 (Ref.) | 0.61 (0.42, 0.90)   | 0.97 (0.58, 1.63)                                      | 1.36 (0.83, 2.25) |
| <b>Black (N = 2,492)</b>       |          |                     |                                                        |                   |
| <b>N. cases</b>                | 260      | 11                  | 6                                                      | 7                 |
| <b>P-years</b>                 | 10,465   | 391                 | 118                                                    | 140               |
| <b>Incidence rate**</b>        | 24.8     | 28.1                | 50.8                                                   | 50.0              |
| <b>Model 1</b>                 | 1 (Ref.) | 1.05 (0.61, 1.81)   | 1.72 (0.76, 3.92)                                      | 1.24 (0.49, 3.16) |
| <b>Model 2</b>                 | 1 (Ref.) | 1.12 (0.64, 1.96)   | 1.53 (0.67, 3.52)                                      | 1.30 (0.51, 3.31) |
| <b>P-value for interaction</b> |          | 0.12                | 0.47                                                   | 0.69              |

\*Hispanic and other race/ethnicities not included in this analysis due to low AF counts. \*\*Crude incidence rate, per 1000 p-years. Model 1: adjusted for age at randomization, education, and sex Model 2: adjusted for age at randomization, education, sex, OAC use, smoking, history of CVD, total cholesterol, HDL cholesterol, eGFR, systolic and diastolic pressure, and BMI.
